1 **Title:** Genome diversity and quorum sensing variations in laboratory strains of *Pseudomonas aeruginosa* PAO1.

2 **Authors:** Yang Liu<sup>1#</sup>, Stephen Dela Ahator<sup>1#</sup>, YINUO Xu<sup>1</sup>, Huishan Wang<sup>1</sup>, Qishun Feng<sup>1</sup>, Xiaofan Zhou<sup>1\*</sup>, Lian-Hui Zhang<sup>1\*</sup>,

3 **Affiliation:** <sup>1</sup>Guangdong Province Key Laboratory of Microbial Signals and Disease Control, Integrative Microbiology Research Centre,

4 South China Agricultural University, Guangzhou 510642, China.

5 **Corresponding Author:** \* xiaofan\_zhou@scau.edu.cn, lhzhang@scau.edu.cn

6 #: These authors contributed equally to this study

## 7 **Abstract**

8 The *Pseudomonas aeruginosa* strain PAO1 has routinely been used as a laboratory model for quorum sensing (QS) studies due to its  
9 extensively coordinated regulatory circuits. However, the microevolution of *P. aeruginosa* laboratory strains resulting in genetic and  
10 phenotypic variations have caused inconsistencies in QS research. To investigate the underlying causes and impact of these variations,  
11 we analyzed 5 *Pseudomonas aeruginosa* PAO1 sublines from our laboratory using a combination of phenotypic characterization, high-  
12 throughput genome sequencing, and bioinformatic analysis. The major phenotypic variations among the sublines spanned across the  
13 levels of QS signals and virulence factors such as pyocyanin and elastase. Furthermore, the sublines exhibited distinct variations in  
14 swarming, twitching and biofilm formation. Most of the phenotypic variations were mapped to the effects of mutations in the *lasR* and  
15 *mexT*, which are key components of the QS circuit. By introducing these mutations in the subline PAO1-E, which is devoid of such  
16 mutations, we confirmed their influence on QS, virulence, motility and biofilm formation. The findings further highlight a possible  
17 divergent regulatory mechanism between the LasR and MexT in the QS pathways in *P. aeruginosa*. The results of our study reveal the  
18 effects of microevolution on the reproducibility of most research data from QS studies and further highlight *mexT* as a key component  
19 of the QS circuit of *P. aeruginosa*.

## 20 **Importance**

21 Microevolution of *P. aeruginosa* laboratory strains results in genotypic and phenotypic variations between strains that have a  
22 significant influence on QS research. This work highlights the variations present in *P. aeruginosa* PAO1 sublines and investigates the  
23 impact of the genetic variations on the QS circuit and QS-regulated virulence determinants. Using a combination of NGS and  
24 phenotypic analysis, we illustrate the impact of microevolution on the reproducibility of QS, virulence, motility, and biofilm studies  
25 among 5 sublines. Additionally, we revealed the significant impact of mutations in key genes such as *mexT* and *lasR* on the QS circuit  
26 and regulation of virulence. In effect, we show the need for limited propagation and proper handling of laboratory isolates to reduce  
27 the microevolution.

28

## 29 **Introduction**

30 *Pseudomonas aeruginosa* causes acute and chronic infections in immune-compromised individuals and cystic fibrosis (CF) sufferers  
31 (Stover et al., 2000). Infections by *P. aeruginosa* are usually difficult to treat and persistent due to the characteristic high frequency of  
32 emergence of antimicrobial-resistant strains during therapy and the ability to switch to a biofilm state under stress conditions (Carmeli

33 et al., 1999). As a metabolically versatile bacterium, it can adapt to myriads of environments by sensing and altering its genetic  
34 regulations to cope with imminent stress conditions. These traits have been shown to be dependent on quorum sensing (QS), the cell-  
35 density dependent regulatory mechanisms that coordinate genetic regulation in response to chemical signals or cues present in its  
36 environment (Jensen et al., 2006).

37 *P. aeruginosa* QS is composed of three main signals N-(3-oxododecanoyl)-L-homoserine lactone (3-oxo-C12-HSL, 3OC12HSL), N-  
38 butanoyl-L-homoserine lactone (C4-HSL, C4HSL), and 2-heptyl-3-hydroxy-4(1H)-quinolone (PQS) which are produced by the *lasI*, *rhlI*,  
39 and *pqsABCDH* gene cluster respectively. These signals bind to their cognate regulators LasR, RhlR and PqsR(MvfR) to activate  
40 downstream virulence factors such as pyocyanin, elastase, rhamnolipids, and pyoverdine (Schuster and Greenberg, 2006; Eickhoff and  
41 Bassler, 2018). In addition, an integrative QS signal (IQS) has also been identified, which could take over the role of upstream *las*  
42 system to regulate the downstream QS systems including *rhl* and *pqs* (Lee et al., 2013). The production of signals and expression of  
43 receptors can be regulated at the transcriptional level by a series of regulators and other metabolic systems. These include the  
44 negative regulators MvaT, QscR, QsIA, QteE, RpoN, RpoS, and RsaL, and positive regulators GacA/GacS, Vfr, VqsR (Lee and Zhang, 2015).  
45 The elaborate network of regulatory pathways which make up the QS circuit in *P. aeruginosa* creates a signaling continuum allowing  
46 for an effective response to varying cues which is vital for fine-tuning the adaptation of the bacterium to imminent stress conditions  
47 (Ahator & Zhang, 2019).

48 The adaptive processes required for the survival of *P. aeruginosa* isolates are driven by selective mutations resulting in genetic and  
49 phenotypic variations, in response to the enormous selection pressures exerted within fluctuating host environments over time (Lee  
50 and Zhang, 2015; Cordero and Polz, 2014). Spontaneous mutations in the QS systems *lasR*, *rhlR* and their cognate synthases *lasI* and  
51 *rhlI*, as well as other QS regulators, are frequently identified in clinical isolates (Hoffman et al., 2009). These mutations result in  
52 attenuation of virulence observed in the switch from acute to chronic infection states, biofilm to planktonic lifestyle transition, and  
53 increased fitness and growth advantage in polymicrobial settings (Wilder et al., 2011)(Köhler et al., 2009). Additionally, mutations  
54 occurring in the *gacS*, *retS*, *ampR*, and the multidrug efflux pump regulators drive the switch from acute to chronic infectious states  
55 and antimicrobial resistance (Winstanley, O'Brien, and Brockhurst, 2016; Balasubramanian, Kumari, and Mathee, 2015).

56 Interestingly, recent studies have also identified genetic and phenotypic diversification among the laboratory strain PAO1 from  
57 different laboratories (Klockgether et al., 2010)(Chandler et al., 2019). The studies revealed sublines of PAO1 exhibiting variability in  
58 metabolism, virulence and cell-cell signaling (Davies and Davies, 2010; Klockgether et al., 2010; Preston et al., 1995) which were  
59 proposed to arise due to prolonged propagation in selective growth media (Klockgether et al., 2010). The genetic and phenotypic  
60 diversification in the sublines have been of broad interest, due to the evidence and impact of microevolution in the sublines presented  
61 in these studies. As PAO1 is commonly used for QS research, such variations could have a significant impact on the reproducibility of  
62 research data. Although, these studies showed the phylogenetic relationship between various sublines based on their genome  
63 composition and mutations, the genetic mechanisms that influence the phenotypic variations among the sublines and their impact on  
64 the variations in QS remain vague.

65 To understand the underlying mechanism responsible for such variations in phenotypes of PAO1 sublines, we investigate the diversity  
66 of 5 *P. aeruginosa* PAO1 sublines and examine the effect of genomic diversity on quorum sensing through high throughput genomic  
67 sequence, virulence and bioinformatic analysis. We obtained 4 sublines from our laboratory collections and 1 subline from University

68 of Washington (U.S.A). By applying a combination of bioinformatics and virulence assays, we were able to map the key genes (*lasR* and  
69 *mexT*) that drive the microevolution of the lab strains and also explain their potential effect on cell-to-cell signaling and virulence in *P.*  
70 *aeruginosa*.

## 71 **Results**

### 72 **PAO1 sublines produce different levels of QS signals and QS-associated virulence factors**

73 Phenotypic variations among the laboratory strains of *P. aeruginosa* PAO1 have been attributed to microevolution of strains during  
74 culture in selective media or prolonged passage in the laboratory (Klockgether et al., 2010) (Chandler et al., 2019). Due to the immense  
75 influence of microevolution on the repeatability of research work particularly in the field of QS, we investigated the impact of such  
76 mutations on the production of QS signals and QS associated virulence factors in 5 PAO1 sublines from our lab collection (Table 1 and  
77 S1). We examined the production of the QS signals, 3OC12HSL, PQS, and C4HSL in the PAO1 sublines using LC-MS analysis. The  
78 production of the QS signals was not consistent across the 5 sublines. The highest amount of 3OC12HSL was produced by PAO1-B and  
79 PAO1-E followed by similar levels in PAO1-C and PAO1-D (Fig 1A). On the other hand, PAO1-C and PAO1-D produced the highest level  
80 of C4HSL compared to the other three sublines (Fig 1B). No significant difference in PQS production was observed in the three sublines,  
81 PAO1-B, C, and D (Fig 1C). The subline PAO1-A was found to produce the least amount of all three QS signals, with trace amounts of  
82 3OC12HSL detected in our analysis (Fig 1). Consistently, the relative expression levels of the QS regulators genes in PAO1-A in  
83 comparison with PAO1-E, correlated well with the production of their cognate QS signals (Fig S2).

84 Elastase, encoded by *lasB* relies on the *las* QS system (Pearson, Pesci, and Iglewski, 1997). Elastase has tissue-damaging and proteinase  
85 inhibiting activity and targets plasma proteins such as immunoglobulins, coagulation, and complement factors (Pearson, Pesci, and  
86 Iglewski, 1997). Across the 5 sublines, PAO1-D produced the highest amount of elastase. However, this was not significantly greater  
87 than the amount produced by PAO1-C (Fig. 1D). Intriguingly, PAO1-A produced similar amounts of elastase as PAO1-B and PAO1-E  
88 despite its low QS signal production. (Fig 1D),

89 Pyocyanin is an evolutionarily conserved virulence factor crucial for *P. aeruginosa* lung infection (Lau et al., 2004). Pyocyanin is  
90 regulated by the *pqs* and *rhl* QS systems, and its production is exacerbated in *lasR* mutants under phosphate depleted condition (Lau et  
91 al., 2004). Quantification of pyocyanin production revealed marked differences in levels across the 5 sublines. PAO1-C and PAO1-D  
92 produced significantly greater levels of pyocyanin compared to PAO1-B and PAO1-E (Fig 1E). PAO1-A produce pyocyanin but  
93 significantly less compared to the PAO1-C/D (Fig 1E).

94 Pyoverdine, the main siderophore produced by *P. aeruginosa* is regulated by QS and is a major contributor to colonization and  
95 establishing infections (Ravel and Cornelis, 2003). The result shows no significant changes in the production of the siderophore among  
96 the other 5 sublines (Fig 1F).

### 97 **Differences in biofilm formation and motility among the PAO1 sublines.**

98 Biofilm is a common adaptive state of *P. aeruginosa* which confers antibiotic resistance, enhances evasion of host immune responses,  
99 and permits persistent infections (Costerton et al., 1999; Gellatly and Hancock, 2013). Biofilm formation of the 5 PAO1 sublines was  
100 assayed using 96-well plates after a 16-hour static culture. From our biofilm assay, we observed different levels of biofilm formation  
101 across the sublines with significantly higher levels occurring in PAO1-B and PAO1-E compared with the other 3 sublines (Fig 2A).

102 Swimming motility which is mediated by flagella was not affected by the mutations in the sublines as no significant differences were  
103 observed across the sublines (Fig 2B). However, different swarming phenotypes were observed among the strains, (Fig 2C). PAO1-D  
104 followed by PAO1-C, swarmed with the largest diameter, whereas PAO1-B and PAO1-E displayed the least swarming motility (Fig 2C)  
105 Pili formation is vital for adhesion, motility, DNA uptake, and biofilm formation (Barken et al., 2008). From our assay, pili-mediated  
106 twitching motility was inconsistent among some of the sublines. PAO1-D exhibited the highest twitching motility followed by PAO1-A.  
107 Almost similar levels of twitching were observed in PAO1-B and PAO1-C which were slightly different in comparison to PAO1-E (Fig 2C).

#### 108 **Genomic variation among PAO1 sublines.**

109 To identify the underlying mutations accounting for the discrepancies in QS associated phenotypes across the 5 PAO1 sublines, we  
110 employed High-Throughput Whole Genome Sequencing (WGS) using Illumina PE-150 and Nanopore technology. The details of the  
111 whole genome sequence data of the selected *P. aeruginosa* PAO1 sublines are summarized in Table 1. The genomes of the strains  
112 were analyzed using both reference-guided mapping and *de novo* assembly approach (Fig S1), coupled with mapping and assembly-  
113 based callers for maximum variation detection.

114 A total of 230 SNPs and short indels was shared among the 5 sublines (Fig 3A). The detailed information of SNPs and short indels in  
115 each subline relative to the reference sequence is summarized in Table 2. Six SNPs and short indels were identified in PAO1-A genome,  
116 an 18 bp deletion in the region of *mexT*, a synonymous variant in PA0020, two resulting in missense variants of PA1975 and PA3191,  
117 one in the non-coding sequence between *psdR-dppA3* intergenic region, and one disruptive in-frame insertion of TCG in sequence for  
118 the autoinducer binding domain in LasR (Heurlier et al., 2005) (Table 2). PAO1-B and PAO1-C shared common SNPs resulting in a  
119 missense variant of the aminoacyl-tRNA biosynthesis gene, PA4277.2. Additionally, the PAO1-C subline contained the other two SNPs,  
120 one resulting in a synonymous variant in PA3316 and the other present in the non-coding region between *psdR* and *dppA3*. The latter  
121 was also identified in the PAO1-C and PAO1-D sublines (Table 2). Five other SNPs and short indels were identified in the PAO1-D  
122 genome, two synonymous variants located in *leuB* and PA0020 and another two as missense variants in *htpG* and PA3637 sequence, in  
123 addition to the intergenic region of *psdR* and *dppA3*(Table 2), also an 18 bp deletion in *mexT* that consistent with indel in PAO1-A. No  
124 unique SNPs were identified in the subline PAO1-E.

125 Using comparative genomic analysis, we identified 3 structural variations (SVs), among which two were present in the 5 sublines (Table  
126 3). These include tandem repeats or copy number variations (CNVs) occurring from PA0717-PA0727 genomic region and deletion in  
127 PA4684/PA4685 region from 5253693 to 5243687(Table 3). The PA0717-PA0727 cluster is annotated as a bacteriophage Pf1-like  
128 hypothetical protein (Hill et al., 1991), whereas PA4684, and PA4685 encode hypothetical proteins and form an operon with PA4686.  
129 These two variations in the PA0717-PA0727 genomic region and the deletion in PA4684/PA4685 region were also detected in *P.*  
130 *aeruginosa* PAO1-DSM (Davies and Davies, 2010), and *P. aeruginosa* isolates PA14 (Klockgether et al., 2011). One unique SV detected  
131 in PAO1-C sublines was due to 8384 bp deletion in the region containing genes of the *mexT*, Resistance-Nodulation-Cell diversion (RND)  
132 multidrug efflux (*mexE*, *mexF*, and *oprN*) and the downstream genes, PA2496, PA2497, and PA2498 (Table 3). This deletion in PAO1-C  
133 is located downstream of *mexT*. Also, a short indel of 18 bp was identified in both PAO1-A and PAO1-D genome in the coding sequence  
134 for the transcriptional regulator MexT (RND multidrug efflux), resulted in disruptive in-frame deletion.

#### 135 **The short Indel of *lasR* and *mexT* affect QS in *P. aeruginosa* PAO1.**

136 Mutations in *mexT* and *lasR* are commonly reported in clinical isolates and have been recently reported in lab strains and clinical  
137 isolates (Klockgether et al., 2010; Köhler et al., 2001; Kostylev et al., 2019; Sobel, Neshat, and Poole, 2005). The *lasR* mutants have  
138 been associated with chronic infections and increased fitness under specific metabolic stress conditions (Köhler et al., 2009). The *mexT*  
139 mutations are also known to be induced by growth in the presence of antibiotics (Sobel, Neshat, and Poole, 2005), and are associated  
140 with the regulation of most QS factors and fitness of *P. aeruginosa* strains (Kostylev et al., 2019). To further investigate the impact of  
141 the MexT and LasR on the variation of QS associated traits among the sublines, we introduced the 18bp *mexT* mutations found in  
142 PAO1-A and PAO1-D into the *mexT* of PAO1-E resulting in the strain PAO1-E $\Delta$ *mexT*. Additionally, we introduced the 3bp insertion in  
143 *lasR* of PAO1-A into PAO1-E to obtain the strain PAO1-E $\Delta$ *lasR*. The PAO1-E $\Delta$ *mexT* produced a significantly decreased level of  
144 3OC12HSL but an increased level of C4HSL production compared to the parent strain (Fig 4A, and 4B). PQS production was not  
145 significantly different between PAO1-E and PAO1-E $\Delta$ *mexT* (Fig 4C). Conversely, in PAO1-E $\Delta$ *lasR*, the production of 3OC12HSL, C4HSL,  
146 and PQS significantly decreased in comparison with the PAO1-E (Fig 4). Additionally, in PAO1-E $\Delta$ *mexT* elastase and pyocyanin  
147 production levels were significantly greater than that of the parental subline PAO1-E whereas their levels significantly decreased in the  
148 PAO1-E $\Delta$ *lasR* (Fig 4D, and 4E).

149 Both PAO1-E $\Delta$ *mexT* and PAO1-E $\Delta$ *lasR* produced less biofilm compared to PAO1-E, however, a much significant decrease in biofilm was  
150 observed in the *lasR* mutant compared to the *mexT* mutant (Fig 4F). Although the 3bp *lasR* insertion had little effect on swarming, the  
151 18bp deletion in *mexT* significantly increased the swarming motility in PAO1-E (Fig 4G). The introduction of the *mexT* mutations in the  
152 PAO1-E, resulted in increased twitching motility, however, no significant difference in twitching was observed in the parent strain and  
153 the PAO1-E $\Delta$ *lasR* (Fig 4G).

#### 154 **Evolution of *mexT* and *lasR* in *P. aeruginosa***

155 Based on the frequency of *lasR* and *mexT* mutations and their influence on the fitness of *P. aeruginosa* strains (Feltner et al.,  
156 2016)(Clay et al., 2020)(Kostylev et al., 2019)(Oshri et al., 2018), we decided to investigate the selective pressure driving *lasR* and *mexT*  
157 mutations in by calculating the substitution rates (nonsynonymous /synonymous (dN/dS)) of 4419 single-copy genes from 298 *P.*  
158 *aeruginosa* strains obtained for the Pseudomonas Genome Database(v18.1) (Winsor et al. 2015). From our analysis, we observed a  
159 higher nonsynonymous substitution rate for *lasR*, denoted by a higher dN/dS value (0.2881) in *lasR* compared to the *pqsR*, *rhII*, *rhIR*,  
160 *mexT*, *lasI* in more than four thousand single-copy genes (Third Quartile=0.1145) (Fig 5A and Table S3). Although *mexT* is mutation-  
161 prone (Sobel et al., 2005), its low nonsynonymous substitution rates reflect a higher negative selection pressure (Fig 5A and Table S3).  
162 For further estimation of the selection pressure and the mutation hot site, we performed the codon alignment of the 2498 *lasR*  
163 sequences and 2643 *mexT* sequences and calculated the dN/dS ratio of each site (Fig 6 and Table S5, S6). Based on the mean posterior  
164 substitution rates, we observed that the LasR site shows more nonsynonymous mutation compared to the MexT in their amino acid  
165 sites (Fig 6A and Table S5, S6). In MexT, three distinct peaks at amino acid positions (17, 28, and 60) showed high mean posterior  
166 substitution rates of nonsynonymous (Fig 6A and Table S6). These results also confirmed that the *mexT* undergoes high negative  
167 selection pressure.

168 We further investigated the nucleotide and amino acid insertion and deletion at each site of both the *lasR* and *mexT* sequences.

169 Although the indel frequency of the *lasR* nucleotide sequences increased after 200bp with an overall higher number of deletions than  
170 insertions, the distribution of insertion and deletion was even throughout the amino acid sequences of LasR (Fig 6B).

171 For the *mexT* sequence, one indel-prone site(GCCGGCCAGCCGGCCA) was detected around 250bp while the indel frequency in the  
172 amino acid sequences of *mexT* increased from the 5' to 3' (Fig 6C).

## 173 Discussion

174 *Pseudomonas aeruginosa* strain PAO1 is one of the most widely used model organisms for QS research. QS in *P. aeruginosa* regulates a  
175 vast majority of the physiological processes and virulence phenotypes (Ahator & Zhang, 2019) hence various research groups have  
176 focused on the development of anti-QS strategies as an alternative to combat the rising cases of antibiotic resistance in *P. aeruginosa*.  
177 However, most clinical isolates lose their QS functions via mutation in the key QS genes as well as mutation-prone genes (Hoffman et  
178 al., 2009) which makes the identification of anti-QS targets daunting. Additionally, the laboratory model organism, PAO1 from different  
179 research centers have been shown to possess gene alterations such as SNPs and deletions in some mutation hotspots which underly  
180 their phenotypic variations and influence the repeatability of *P. aeruginosa* research (Klockgether et al., 2010)(Chandler et al.,  
181 2019)(Hazen et al., 2016). Among the frequently occurring mutations in both *P. aeruginosa* clinical isolates and laboratory strains  
182 are the *lasR* and *mexT* mutations which are vital for QS regulation, multidrug resistance and drive adaptative processes in *P.*  
183 *aeruginosa* isolates to maximize their propagation during infection (Hazen et al., 2016)(Winstanley et al., 2016)

184 Although previous studies have examined the genetic and phenotypic variations arising due to microevolution in lab strains of PAO1  
185 sublines (Klockgether et al., 2010; Chandler et al., 2019)(Hazen et al., 2016), they did not provide evidence of the underlying mutations  
186 driving the variations in QS associated phenotypes, biofilm, motility as well as other virulence determinants of the bacteria. To further  
187 understand the impact of these microevolution and the genetic basis for the variations in phenotypes among the strains in our lab, we  
188 examined the mutations present in 5 sublines of *P. aeruginosa* PAO1 and their effect on QS and virulence. Our study used a  
189 combination of whole genome sequencing and molecular biology techniques to highlights the impact of minute gene alterations on QS  
190 and virulence among *P. aeruginosa* PAO1 sublines. Significantly, we further provide evidence that mutations in the transcriptional  
191 regulators, LasR and MexT completely destabilize the QS circuit and account for the variations in the production of the PQS and C4HSL  
192 and their associated virulence factors among the sublines. Thus, indicating the significant impact of microevolution on the repeatability  
193 of QS and virulence studies using laboratory collections of PAO1.

194 MexT is a positive regulator of MexEF-OprN efflux pump and represses the outer membrane porin protein OprD (Sobel, Neshat, and  
195 Poole, 2005; Köhler et al., 1999; Ochs et al., 1999). From our analysis, *mexT* mutations were identified in two of the sublines with an  
196 additional subline containing deletion of the region containing the *mexT* and *mexEF-oprN* cluster as well as the PA2496, PA2497,  
197 PA2498. The *mexT* mutations have been reported in other studies of clinical and lab strains (Chandler et al., 2019; Klockgether et al.,  
198 2010; Poonsuk, Tribuddharat, and Chuanchuen, 2014; Quale et al., 2006; Sobel, Neshat, and Poole, 2005; Walsh and Amyes, 2007). In  
199 support, recent work showed MexT as a factor that reorganizes the QS system in *P. aeruginosa* independent of *lasR* and is therefore  
200 vital for the fitness of the bacteria (Kostylev et al. 2019). This in part can be due to the function of the MexEF-OprN in transporting of  
201 homoserine lactones and influence on cell-cell signaling (Köhler et al. 2001).

202 MexT mutations could promote pleiotropic effects on the cell as it influences the expression of at least 40 genes (Tian, Fargier, et al.,  
203 2009). Accordingly, by introducing the 18bp *mexT* mutation in the PAO1-E subline, we observed significant changes in QS signal  
204 production as well as pyocyanin, elastase, biofilm formation and motility. Based on our data, we believe that MexT may have an  
205 opposing role to LasR and may thus serve a compensatory mutation for *lasR* mutants or vice versa. PAO1-A had both *lasR* and *mexT*  
206 mutations with a characteristic loss on 3OC12HSL production but did not lose its ability to produce virulence factors such as pyocyanin,  
207 elastase and pyoverdine (Fig 4). Thus, a combination of *mexT* and *lasR* mutations does not drive the bacteria towards a non-virulent  
208 state as compared to *lasR* mutations alone. As such despite producing the least levels of QS signals with almost no 3OC12HSL, PAO1-A  
209 still produced virulence factors and formed biofilms and maintained its motility morphology comparable to the other sublines (Fig 1, 2,  
210 4).

211 In support of the above observation, we note that mutation of *lasR* alone decreased the production of pyocyanin in the PAO1-E which  
212 was contrary to *mexT* mutations in the same subline. Pyocyanin is regulated in a *las*-independently manner by the *pqs* and *rhl* systems.  
213 Also, despite the defective *las* system, elastase production was comparable among PAO1-A, PAO1-B and PAO1-E. Although the *las*  
214 system regulates elastase production (Rust, Pesci, and Iglewski, 1996), the defective *las* system in PAO1-A did not cause a significant  
215 loss in elastase production. Hence it is highly possible that the defective *las* system coupled with the *mexT* mutation may account for  
216 the increase in pyocyanin and elastase production in PAO1-A. This in part could be due to the independent regulation of the *pqs* and  
217 *rhl* systems or the effect of *mexT* mutation.

218 Due to the importance of motility for promoting infections, colonization, and initializing biofilm formation on both biotic and abiotic  
219 surfaces (O'Toole and Kolter, 1998), the differences in motility observed in the sublines will greatly impact their level of pathogenicity.  
220 Another interesting observation in the interplay of *mexT* and *lasR* is the control of twitching and swarming motility. The high levels of  
221 twitching and swarming observed in the sublines, PAO1-C, PAO1-D and PAO1-E $\Delta$ *mexT* containing *mexT* mutations affirms the negative  
222 regulation of MexT on pili formation and flagellar mediated motility (Tian, Mac Aogain, et al., 2009). Twitching is influence by type IV  
223 pili whereas swarming is influenced by both flagellar and type IV pili (Breidenstein, Fuente-Núñez, and Hancock, 2011; Taguchi and  
224 Ichinose, 2011; Mattick, 2002; Ichinose et al., 2016). Accordingly, we believe that the increase in twitching motility in PAO1-D  
225 compared to PAO1-E is due to *mexT* mutation. Although the *las* QS system does not regulate twitching motility (Beatson et al., 2002)  
226 (Burrows, 2012), certain factors such rhamnolipids which influence motility are regulated by the *las* system (Pearson, Pesci, and  
227 Iglewski, 1997; Tian, Mac Aogain, et al., 2009; Köhler et al., 2001). The defective *lasR* and *mexT* in PAO1-A, we observe a slight increase  
228 in twitching and swarming above those of the PAO1-B and PAO1-E sublines. Also, as MexT regulation of twitching motility could be  
229 dependent or independent of MexEF-OprN (Tian, Mac Aogain, et al., 2009), we believe that the deletion of the *mexT*, *mexEF-oprN*  
230 gene cluster could account for the loss of twitching motility in the PAO1-C.

231 This work presents fascinating information about alternative pathways the compensate for loss of QS mediated functions and reaffirms  
232 the role of MexT in reorganizing the QS system in the bacteria. We observe an interesting relationship between *lasR* and *mexT*, where  
233 *mexT* tends to alleviate the loss of QS associated virulence caused by *lasR* defects which is particularly important for *P. aeruginosa*  
234 during the acute-chronic infection switch. As lower dN/dS (0.0378) in *mexT* in comparison to that of *lasR* and other single-copy genes  
235 (First Quartile=0.0351) (Fig 5A, and 6), indicated the *mexT* is under higher selection pressure. It is possible that mutations occurring in  
236 *mexT* drive the bacterial towards a more virulent state which could be compensatory and may be vital for the switch from avirulent to

237 virulent phenotypes during the different stages of bacterial infections. Survival of *mexT* mutants is therefore cued towards the  
238 existence of synonymous mutations which favor selection or survival compared to nonsynonymous mutation.  
239 Our study focused more on the genes that directly affect QS in *P. aeruginosa*, the interaction between *lasR* and *mexT* still need further  
240 investigation. Also mutations in genes such as *psdR* which influences the fitness of the bacteria and non-cooperative cheating in the  
241 presence of *lasR* mutants(Asfahl et al., 2015)(Kostylev et al., 2019) is currently being studies in our lab. Mutations in the intergenic  
242 region of transcriptional regulator, PsdR has been shown to arise early in the evolution of *P. aeruginosa* strains growing in the  
243 presence of casein, enhances fitness in the presence of *lasR* cheaters (Dandekar et al., 2012). DppA3 is a dipeptide binding protein  
244 with specificity for the transport of L-amino acids (Pletzer et al., 2014)(Fernández et al., 2019). Derepression of this function of DppA3  
245 by PsdR has been shown to enhance non-cooperative cheating in *P. aeruginosa* population under QS-inducing conditions (Asfahl et al.,  
246 2015). As most of the regulatory systems in *P. aeruginosa* are highly coordinated and exhibit cross-talk, it may be a bit daunting to  
247 directly link phenotypes to specific microevolution events. Also, mutations in *lasR* and *mexT* occur during prolonged passage in special  
248 media and exposure to sub-inhibitory concentrations of antibiotics (Maseda et al., 2000; Hoffman et al., 2009), hence storage of  
249 laboratory collections of wild type PAO1 strains after prolonged passage or growth in the presence of such conditions should be  
250 avoided to minimize the microevolution of the strains. Understanding how these processes occur can help to address important  
251 problems in microbiology by explaining observed differences in phenotypes, including virulence and resistance to antibiotics and the  
252 discrepancies in QS research.

## 253 **Materials and Methods**

254 **Bacterial strains and growth conditions.** The *P. aeruginosa* PAO1 strains used in this study are list in Table 1. All Strain were  
255 maintained in 40 % glycerol, 60 % Lysogeny Broth (LB, 1 /L, 15 g Agar, 10 g Tryptone (Sigma-Aldrich), 5 g Yeast Extract(Sigma-Aldrich),  
256 10 g NaCl) at -80 °C. For all experiments, cultures were inoculated directly from the stock used for sequencing without subculturing.

257 **Genomic DNA extraction and whole genomic sequences.** The EasyPure Bacteria Genomic DNA Kit (EE161-01, Transgenbiotech, Beijing,  
258 China) was used for the extraction of the genomic DNA from the sublines. The concentration of genomic DNA was measured by  
259 NanoDrop and stored at -20 °C. The genomic DNA of the five sublines were submitted for sequencing using the Illumina NovaSeq S4  
260 PE-150 (Novogene, China) and Oxford Nanopore MinION (Nextomics Biosciences, China).

261 **Genome assembly, mapping and genome annotation.** Sequences were checked by FastQC software (Andrews et al., 2010), a quality  
262 control tool for high throughput raw data. Short reads were mapped against the reference using Burrows-Wheeler Aligner BWA-MEM  
263 (Li and Durbin, 2009) whereas long reads were mapped using Minimap2 (Li, 2018). *De novo* assembly was performed using Unicycler  
264 (Wick et al., 2017) with SPAdes algorithm and assembled data summarized by BBMap (Bushnell, 2014). For gene prediction and  
265 annotation, the DDBJ Fast Annotation and Submission Tool DFAST (Tanizawa, Fujisawa, and Nakamura, 2017). pyani(Pritchard et al.,  
266 2016) software ANIb method were used to phylogenetic analysis by calculating Average Nucleotide Identity (ANI).

267 **SNP detection and analysis.** A combination of software was used for SNPs calling. The SAMtools and bcftools (Li, 2011) were used to  
268 map short reads aligned with the *P. aeruginosa* PAO1 reference genome (NO. NC\_002516.2). GATK Best Practices (Van der Auwera et  
269 al., 2013; DePristo et al., 2011) was used for variant calling workflow. The SAMtools and bcftools calling were trimmed by removing  
270 MIN(QUAL) < 100 SNPs. GATK SNPs calling were followed by germline short variant discovery (SNPs + Indels) using HaplotypeCaller and



271 GenotyperGVCFs tools (Poplin et al., 2018). SNPs were further trimmed by removing MIN(QUAL) <500. SNPs were also identified in the  
272 assembled data generated by the Unicycler using Mummer (Kurtz et al., 2004) and progressiveMauve (Darling, Mau, and Perna, 2010).  
273 The SNPs produced by the four tools were merged and false-positive SNPs eliminated by checking the original mapped short reads bam  
274 file manually using IGV (Robinson et al., 2011). The supporting reads which were less than 25 % were not considered as SNPs.

275 **Structure variation (SV) detection and analysis.** Integrated structural variant multiple callers were used to detecting SVs. The  
276 Structural Variants from Mummer svmu (Chakraborty et al., 2018) tool was used to compare *de novo* assembly sequence against the  
277 reference. BreakDancer (Chen et al., 2009) was used to set sorted mapping input bam files and filter the total number of reads pairs >  
278 3 or confidence score > 85 %. Using Pindel (Ye et al., 2009), which operates on a read-pair based method, the outputs allele depth(AD)  
279 over 20 % were kept and for split-reads based DELLY (Rausch et al., 2012) , the outputs paired-end supported site(PE) < 2 were  
280 discarded. Also, Svseq2 (Zhang, Wang, and Wu, 2012) was used to detect deletions and insertions. All results were merged to obtain a  
281 final list of SVs by a union of the output from the individual callers. A diagrammatic representation of the filter parameter is shown in  
282 Fig S1.

283 **SNPs and SV annotation.** The common SNPs and SVs in the sublines were manipulated by the command line script to separate from  
284 individual variation. All SNPs and SVs were customized into a VCF file on demand by the shell script. SnpEff (Cingolani et al., 2012) was  
285 used for variation annotation to predict the effect of the generic variants against the SnpEff database *P. aeruginosa* PAO1 strain.

286 **Selective pressure of *Pseudomonas aeruginosa* single-copy genes.** The raw data (Pseudomonas Ortholog Groups) used for the  
287 mutation rate analysis was collected from Pseudomonas Genome Database (Winsor et al., 2015)(v18.1). The downloaded Ortholog  
288 files were filtered by the python script to obtain only 4419 single-copy gene and 298 *Pseudomonas aeruginosa* strain. The nucleotide  
289 sequences were extracted by mapping gene name and strain name to Pseudomonas Genome Database (Winsor et al., 2015)(v18.1)  
290 Annotations (GFF3) and Genomic DNA (Fasta) files. Single-copy gene files were translated by EMBOSS Transeq tool (Rice, Longden, and  
291 Bleasby, 2000), aligned by mafft tool (parameter:retree 1) (Kato et al., 2002). The codon alignment was generated through pal2nal.pl  
292 (Suyama, Torrents, and Bork, 2006) program and the alignment files were trimmed by trimAl (parameter:gappout) (Capella-Gutiérrez,  
293 Silla-Martínez, and Gabaldón, 2009). The required treefile for subsequent analysis was generated by iqtree (parameter:st=DNA  
294 m=GTR+G4 nt=1 fast) (Nguyen et al., 2014) for single-copy gene files, individually. The mutation rate of each single-copy gene was  
295 calculated by HyPhy-Branch-Site Unrestricted Statistical Test for Episodic Diversification (hyphy BUSTED) (Murrell et al., 2015).  
296 Nonsynonymous/synonymous (dN/dS) ratio were generated by improving branch lengths, nucleotide substitution biases, and global  
297 dN/dS ratios under a full codon model. The mutation rates are in Table S3.

298 **Estimate mean posterior synonymous substitution rate and mutational type of *P. aeruginosa lasR* and *mexT* gene site.** The *lasR* and  
299 *mexT* sequences were blasted against all *P. aeruginosa* complete and draft genome in the Pseudomonas Genome Database (Winsor et  
300 al. 2015)(v18.1). Codon alignment of the *lasR* (2498) and *mexT* (2643) sequences was performed by transeq, mafft and pal2nal tools.  
301 The multiple sequence alignments files were trimmed by the python script to make them inframe and remove the stop codon. The  
302 mutation rate of each site was calculated by hyphy FUBAR(Murrell et al. 2013). The mutational types were calculated via a Biopython  
303 script.

304 **In-frame deletion and knock-in.** DNA manipulation was conducted by In-frame deletions and insertion described previously (Filloux  
305 and Ramos, 2014). The DNA fragments for 3bp insertion in *lasR* and 18bp deletion in *mexT* mutations were synthesized by Sangon  
306 Biotech (China). The fragments were cloned into pK18mobsacB plasmid using ClonExpress MultiS One Step Cloning Kit (C113-01,  
307 Vazyme) for construction gene knock-in and deletion constructs. The constructs were transformed into *E. coli* S17-1 for conjugation  
308 with PAO1-E. Transconjugants were selected on Minimal Media(MM) supplemented with gentamicin (30 µg/mL ) and transferred onto  
309 MM supplemented with 10% (wt/vol) sucrose to select mutants. Mutants containing the desired deletion and insertion were  
310 confirmed by PCR and DNA Sanger sequencing.

311 **Motility.** Motility was assayed by Plate-Based method as previously described (Filloux and Ramos, 2014). Swimming motility was  
312 assessed on 0.3 % agar plates (1 /L, 3 g Bacto agar (Becton Dickinson), 8 g Nutrient Broth (Becton Dickinson)). Overnight cultures (37 °C,  
313 200 rpm; LB) were used to inoculate swim plates by depositing 1 µl of culture directly into the agar in the center of the plate. Plates  
314 were incubated face up at 37 °C, and the swim diameter (in centimeters) recorded at 16h. Swimming motility was assessed on 0.6 %  
315 agar plates (1 /L, 6 g Bacto agar (Becton Dickinson), 5 g Bacton-peptone (Becton Dickinson), 3 g Yeast Extract (Sigma), 5 g D. glucose).  
316 Overnight cultures (37 °C, 200 rpm; LB) were used to inoculate swam plates by depositing 1 µl of culture directly into the agar in the  
317 center of the plate. Plates were incubated face up at 37 °C, and the swam recorded at 16h. Twitching motility was assessed on 1.5 %  
318 agar LB plates. Overnight cultures (37 °C, 200 rpm; LB) were used to inoculate twitch plates by depositing 1 µl of culture directly into  
319 agar in the bottom of the plate. Plates were incubated face down at 37 °C for 16h, and the Twitch visualized by fixing the culture with  
320 Water : Glacial acetic Acid : Methanol at a ratio of 4 : 1 : 5 and stained with 0.1% crystal violet.

321 **Pyoverdine quantification.** *Pseudomonas aeruginosa* PAO1 were cultivated in 37 °C in Iron-depleted succinate medium(1 /L, 7.86 g  
322 K<sub>2</sub>HPO<sub>4</sub>·3H<sub>2</sub>O, 3 g KH<sub>2</sub>PO<sub>4</sub>, 1 g (NH<sub>4</sub>)<sub>2</sub>SO<sub>4</sub>; 0.1 g MgSO<sub>4</sub>·7H<sub>2</sub>O; 4 g succinate; PH=7.0) (Stintzi et al., 1998). The OD600 was recorded  
323 after 24 h culture using spectrophotometer. Cell-free supernatant was collected by max speed centrifuged and measured at A404 was  
324 recorded using succinate medium as a blank.

325 **Pyocyanin quantification.** Pyocyanin was assayed from *P. aeruginosa* PAO1 cultured in LB medium overnight at 37 °C and 250 rpm.  
326 Single colony was inoculated into 10 mL culture for 16 h. The 5 mL culture were centrifuged at 12,000 × *g* for 5 min and the cell free  
327 supernatants mixed with equal volume of chloroform followed by continuous rocking for 30 min at room temperature. The solvent  
328 phase was obtained by brief centrifugation, mixed with 5 mL 0.2 mol/ L HCl and rocked at room temperature for an additional 30 min  
329 (Filloux and Ramos, 2014). The pyocyanin quantification was determined by measuring absorbance of supernatant at A520 nm and  
330 normalizing against the cell density at OD600.

331 **Elastase quantification.** Elastase production in *P. aeruginosa* strains were performed by Elastin-Congo Red (Sigma) assay (Ohman, Cryz,  
332 and Iglewski, 1980). Single colonies of the *P. aeruginosa* strains were inoculated into 10 mL LB and cultured for 16 h at 37 °C and 250  
333 rpm. The cultures were centrifuged at 12,000 × *g* for 5 min to obtain cell-free supernatant. Briefly, 500 µL of bacterial cell-free  
334 supernatant was mixed with an equal volume of 5 mg/ mL elastin-Congo red with ECR buffer in 2 mL Eppendorf tube and incubated at  
335 37 °C shaker for 2 h. The quantity of Congo red dye released from the elastin digestion is proportional to the amount of elastase in the  
336 supernatant. Elastase quantification was determined using a spectrophotometer at A520 and normalized against the cell density at  
337 OD600.

338 **Biofilm formation assay and quantification.** Biofilm formation was assayed by 96-well plates as previously described (Filloux and  
339 Ramos, 2014). A single colony was inoculated into 10 mL LB broth and grown at 37 °C, 200 rpm overnight. OD600 was measured by  
340 nanodrop spectrophotometer and the culture was diluted to OD600 = 0.5. A volume of 1 µL diluted cells was added to 200 µL LB  
341 medium in sterile 96 well plate incubate at 37 °C statically for 16 h. The plate was washed with Ultra-pure water at least 3 times and  
342 stained with 250 µL 0.1 % crystal violet for 15 min. The plate was rinsed, dried at room temperature and the remaining dye was  
343 solubilized with 300 µL Dimethyl sulfoxide (DMSO). The dissolved biofilm was measured by the spectrophotometer at absorbance  
344 A550.

345 **Quorum sensing signal extraction and quantification.** QS signal extraction was conducted as previously described by (Dong et al.,  
346 2008). Single colonies of the *P. aeruginosa* cells were inoculated into 5 mL LB broth and grown overnight at 37 °C and 200 rpm. The  
347 signals were extracted from 5 mL of supernatants with an equal volume of acidified ethyl acetate (0.1 % Acetic acid) twice. The organic  
348 phase was transfer to a fresh tube and dried with nitrogen gas. The extracted compounds were dissolved in 1 mL filtered HPLC grade  
349 methanol for LC-MS analysis.

350 The LC-MS method was adapted from the Nishaben M. Patel method (Patel et al., 2016). HPLC was performed on a Dionex UltiMate  
351 3000 system (Thermo Fisher Scientific) using a C18 reverse-phase column (Thermo Fisher Scientific) and varying concentration  
352 gradients of methanol and consisted of 0.1 % acidified water as mobile phase. The gradient profile for chromatography was as follows:  
353 2 % methanol and 98 % water for 1.5 min, linear increase in methanol to 100 % over 5 min, isocratic 100 % methanol for 4 min, and  
354 then equilibration with 2 % methanol and 98 % water for 1.5 min. The flow rate was constant at 0.4 mL/ min.

355 Compounds separated by HPLC were detected by heated electrospray ionization coupled to high-resolution mass spectroscopy (HESI-  
356 MS, Q Exactive Focus, Thermo Fisher Scientific). The analysis was performed under positive ionization mode. Settings for the ion  
357 source were: 10 aux gas flow rate, 40 sheath gas flow rate, 0 sweep gas flow rate, 4 kV spray voltage, 320 °C capillary temperature,  
358 350 °C heater temperature, and 50 S-lens RF level. Nitrogen was used as a nebulizing gas by the ion trap source. The MS/MS method  
359 was designed to perform an MS1 full-scan (100 to 1000 m/z, no fragmentation) together with the SIM model. Settings for the SIM  
360 method were 35000 resolution, 1.0 m/z isolation offset, 4.0 isolation window and centroid spectrum. Signals mass scans were set  
361 3OC12HSL at 298.20128 m/z, C4HSL at 172.09682 m/z, PQS at 260.1645 m/z, respectively. Data analysis was performed using the  
362 Thermo Xcalibur software (Thermo Fisher Scientific) and TraceFinder (Thermo Fisher Scientific).

363 **RNA purification and qPCR analysis.** Overnight culture of *P. aeruginosa* PAO1 were diluted in LB broth and incubated at 37 °C to  
364 OD600 =1.0. Bacterial pellets were obtained by centrifugation at 4 °C for 3 min at 12,000 × *g*. Total RNA samples were purified using  
365 the RNeasy miniprep kit (Z3741, Promega) following the manufacturers' instruction. Genomic DNA was digested by using the TURBO  
366 DNA-free Kit (AM1907, Thermo Fisher Scientific) and the integrity and purity of the RNA determined by nanodrop and gel  
367 electrophoresis. cDNA was generated by using FastKing RT Kit (KR116, Tiangen, China) and Real-time qPCR was carried out using  
368 PowerUp™ SYBR™ Green Master Mix (A25742, Applied Biosystems™) in the QuantStudio™ 6 Flex Real-Time PCR System (Applied  
369 Biosystems™). The *proC* and *rpoD* were used as house-keeping genes. The primer specific to the original copy of genes are list in the  
370 table S2.

371 **Data analysis.** Data are expressed as means  $\pm$  standard error. Significance was determined using one-way ANOVA analysis of variance  
372 with Tukey HSD multiple comparisons in Python(version 3.7). A P value of  $< 0.05$  was considered significant. Plots were generated by R  
373 (version 3.60).

374 **Accession number(s).** This Whole Genome Sequence project has been deposited at NCBI/DDBJ/ENA under the BioProject accession  
375 number PRJNA596099.

## 376 **Supplemental Material**

377 **M 1. Supplemental Table.**

378 **M 2. Supplemental Figure.**

## 379 **Acknowledgments**

380 This work was supported by the Natural Research Foundation of China (Grant No.: 31330002), Key Projects of Guangzhou Science and  
381 Technology Plan (Grant No.: 201804020066), Guangdong Technological Innovation Strategy of Special Funds (Grant No.:  
382 2018B020205003).

383

## 384 **Reference**

385 Andrews, Simon, and others. 2010. "FastQC: A Quality Control Tool for High Throughput Sequence Data." Babraham Bioinformatics,  
386 Babraham Institute, Cambridge, United Kingdom.

387 Balasubramanian, Deepak, Hansi Kumari, and Kalai Mathee. 2015. "Pseudomonas Aeruginosa Ampr: An Acute–Chronic Switch  
388 Regulator." *Pathogens and Disease* 73 (2): 1.

389 Bankevich, Anton, Sergey Nurk, Dmitry Antipov, Alexey A Gurevich, Mikhail Dvorkin, Alexander S Kulikov, Valery M Lesin, et al. 2012.  
390 "SPAdes: A New Genome Assembly Algorithm and Its Applications to Single-Cell Sequencing." *Journal of Computational Biology* 19 (5):  
391 455–77.

392 Barken, Kim B, Sünje J Pamp, Liang Yang, Morten Gjermansen, Jacob J Bertrand, Mikkel Klausen, Michael Givskov, Cynthia B  
393 Whitchurch, Joanne N Engel, and Tim Tolker-Nielsen. 2008. "Roles of Type Iv Pili, Flagellum-Mediated Motility and Extracellular Dna in  
394 the Formation of Mature Multicellular Structures in Pseudomonas Aeruginosa Biofilms." *Environmental Microbiology* 10 (9): 2331–43.

395 Beatson, Scott A, Cynthia B Whitchurch, Annalese BT Semmler, and John S Mattick. 2002. "Quorum Sensing Is Not Required for  
396 Twitching Motility in Pseudomonas Aeruginosa." *Journal of Bacteriology* 184 (13): 3598–3604.

397 Breidenstein, Elena BM, César de la Fuente-Núñez, and Robert EW Hancock. 2011. "Pseudomonas Aeruginosa: All Roads Lead to  
398 Resistance." *Trends in Microbiology* 19 (8): 419–26.

399 Burrows, Lori L. 2012. "Pseudomonas Aeruginosa Twitching Motility: Type Iv Pili in Action." *Annual Review of Microbiology* 66: 493–520.

400 Bushnell, Brian. 2014. "BBMap: A Fast, Accurate, Splice-Aware Aligner." Lawrence Berkeley National Lab.(LBNL), Berkeley, CA (United  
401 States).

- 402 Capella-Gutiérrez, Salvador, José M Silla-Martínez, and Toni Gabaldón. 2009. "TrimAl: A Tool for Automated Alignment Trimming in  
403 Large-Scale Phylogenetic Analyses." *Bioinformatics* 25 (15): 1972–3.
- 404 Carmeli, Yehuda, Nicolas Troillet, George M Eliopoulos, and Matthew H Samore. 1999. "Emergence of Antibiotic-Resistant  
405 *Pseudomonas Aeruginosa*: Comparison of Risks Associated with Different Antipseudomonal Agents." *Antimicrobial Agents and*  
406 *Chemotherapy* 43 (6): 1379–82.
- 407 Chakraborty, Mahul, Nicholas W VanKuren, Roy Zhao, Xinwen Zhang, Shannon Kalsow, and JJ Emerson. 2018. "Hidden Genetic  
408 Variation Shapes the Structure of Functional Elements in *Drosophila*." *Nature Genetics* 50 (1): 20.
- 409 Chandler, Courtney E, Alexander M Horspool, Preston J Hill, Daniel J Wozniak, Jeffrey W Schertzer, David A Rasko, and Robert K Ernst.  
410 2019. "Genomic and Phenotypic Diversity Among Ten Laboratory Isolates of *Pseudomonas Aeruginosa* Pao1." *Journal of Bacteriology*  
411 201 (5): e00595–18.
- 412 Chen, Ken, John W Wallis, Michael D McLellan, David E Larson, Joelle M Kalicki, Craig S Pohl, Sean D McGrath, et al. 2009.  
413 "BreakDancer: An Algorithm for High-Resolution Mapping of Genomic Structural Variation." *Nature Methods* 6 (9): 677.
- 414 Cingolani, Pablo, Adrian Platts, Le Lily Wang, Melissa Coon, Tung Nguyen, Luan Wang, Susan J Land, Xiangyi Lu, and Douglas M Ruden.  
415 2012. "A Program for Annotating and Predicting the Effects of Single Nucleotide Polymorphisms, Snpeff: SNPs in the Genome of  
416 *Drosophila Melanogaster* Strain W1118; Iso-2; Iso-3." *Fly* 6 (2): 80–92.
- 417 Coggan, Kimberly A, and Matthew C Wolfgang. 2012. "Global Regulatory Pathways and Cross-Talk Control *Pseudomonas Aeruginosa*  
418 Environmental Lifestyle and Virulence Phenotype." *Current Issues in Molecular Biology* 14 (2): 47.
- 419 Cordero, Otto X, and Martin F Polz. 2014. "Explaining Microbial Genomic Diversity in Light of Evolutionary Ecology." *Nature Reviews*  
420 *Microbiology* 12 (4): 263–73.
- 421 Costerton, J William, Philip S Stewart, and E Peter Greenberg. 1999. "Bacterial Biofilms: A Common Cause of Persistent Infections."  
422 *Science* 284 (5418): 1318–22.
- 423 Cunliffe, Heather E, Tony R Merriman, and Iain L Lamont. 1995. "Cloning and Characterization of *pvdS*, a Gene Required for Pyoverdine  
424 Synthesis in *Pseudomonas Aeruginosa*: *PvdS* Is Probably an Alternative Sigma Factor." *Journal of Bacteriology* 177 (10): 2744–50.
- 425 Dandekar, Ajai A, Sudha Chugani, and E Peter Greenberg. 2012. "Bacterial quorum sensing and metabolic incentives to cooperate."  
426 *Science* 338 (6104): 264–66.
- 427 Darling, Aaron E, Bob Mau, and Nicole T Perna. 2010. "ProgressiveMauve: Multiple Genome Alignment with Gene Gain, Loss and  
428 Rearrangement." *PLoS One* 5 (6): e11147.
- 429 Davies, Julian, and Dorothy Davies. 2010. "Origins and Evolution of Antibiotic Resistance." *Microbiol. Mol. Biol. Rev.* 74 (3): 417–33.
- 430 Dekimpe, Valerie, and Eric Deziel. 2009. "Revisiting the Quorum-Sensing Hierarchy in *Pseudomonas Aeruginosa*: The Transcriptional  
431 Regulator *Rhlr* Regulates *Lasr*-Specific Factors." *Microbiology* 155 (3): 712–23.
- 432 Dela, S Ahator, and L Zhang. 2019. "Small Is Mighty-Chemical Communication Systems in *Pseudomonas Aeruginosa*." *Annual Review of*  
433 *Microbiology*.

- 434 DePristo, Mark A, Eric Banks, Ryan Poplin, Kiran V Garimella, Jared R Maguire, Christopher Hartl, Anthony A Philippakis, et al. 2011. "A  
435 Framework for Variation Discovery and Genotyping Using Next-Generation Dna Sequencing Data." *Nature Genetics* 43 (5): 491.
- 436 Dong, Yihu, Xi-Fen Zhang, Shu-Wen An, Jin-Ling Xu, and Lian-Hui Zhang. 2008. "A Novel Two-Component System Bqss-Bqsr Modulates  
437 Quorum Sensing-Dependent Biofilm Decay in Pseudomonas Aeruginosa." *Communicative & Integrative Biology* 1 (1): 88–96.
- 438 Eickhoff, Michaela J, and Bonnie L Bassler. 2018. "SnapShot: Bacterial Quorum Sensing." *Cell* 174 (5): 1328–8.
- 439 Filloux, Alain, and Juan-Luis Ramos. 2014. *Pseudomonas Methods and Protocols*. Springer.
- 440 Gellatly, Shaan L, and Robert EW Hancock. 2013. "Pseudomonas Aeruginosa: New Insights into Pathogenesis and Host Defenses."  
441 *Pathogens and Disease* 67 (3): 159–73.
- 442 Gottesman, Susan. 2005. "Micros for Microbes: Non-Coding Regulatory Rnas in Bacteria." *TRENDS in Genetics* 21 (7): 399–404.
- 443 Harrison, Freya, Jon Paul, Ruth C Massey, and Angus Buckling. 2008. "Interspecific Competition and Siderophore-Mediated  
444 Cooperation in Pseudomonas Aeruginosa." *The ISME Journal* 2 (1): 49.
- 445 Heurlier, Karin, Valérie Déneraud, Marisa Haenni, Lionel Guy, Viji Krishnapillai, and Dieter Haas. 2005. "Quorum-Sensing-Negative  
446 (lasR) Mutants of Pseudomonas Aeruginosa Avoid Cell Lysis and Death." *Journal of Bacteriology* 187 (14): 4875–83.
- 447 Hill, DF, NJ Short, RN Perham, and GB Petersen. 1991. "DNA Sequence of the Filamentous Bacteriophage Pf1." *Journal of Molecular  
448 Biology* 218 (2): 349–64.
- 449 Hoffman, Lucas R, Hemantha D Kulasekara, Julia Emerson, Laura S Houston, Jane L Burns, Bonnie W Ramsey, and Samuel I Miller. 2009.  
450 "Pseudomonas Aeruginosa lasR Mutants Are Associated with Cystic Fibrosis Lung Disease Progression." *Journal of Cystic Fibrosis* 8 (1):  
451 66–70.
- 452 Ichinose, Yuki, Takahiro Sawada, Hidenori Matsui, Mikihiro Yamamoto, Kazuhiro Toyoda, Yoshiteru Noutoshi, and Fumiko Taguchi.  
453 2016. "Motility-Mediated Regulation of Virulence in Pseudomonas Syringae." *Physiological and Molecular Plant Pathology* 95: 50–54.
- 454 Jensen, Vanessa, Dagmar Löns, Caroline Zaoui, Florian Bredenbruch, Andree Meissner, Guido Dieterich, Richard Münch, and Susanne  
455 Häussler. 2006. "RhIR Expression in Pseudomonas Aeruginosa Is Modulated by the Pseudomonas Quinolone Signal via Phob-  
456 Dependent and-Independent Pathways." *Journal of Bacteriology* 188 (24): 8601–6.
- 457 Katoh, Kazutaka, Kazuharu Misawa, Kei-ichi Kuma, and Takashi Miyata. 2002. "MAFFT: A Novel Method for Rapid Multiple Sequence  
458 Alignment Based on Fast Fourier Transform." *Nucleic Acids Research* 30 (14): 3059–66.
- 459 Klockgether, Jens, Nina Cramer, Lutz Wiehlmann, Colin F Davenport, and Burkhard Tümmler. 2011. "Pseudomonas Aeruginosa  
460 Genomic Structure and Diversity." *Frontiers in Microbiology* 2: 150.
- 461 Klockgether, Jens, Antje Munder, Jens Neugebauer, Colin F Davenport, Frauke Stanke, Karen D Larbig, Stephan Heeb, et al. 2010.  
462 "Genome Diversity of Pseudomonas Aeruginosa Pao1 Laboratory Strains." *Journal of Bacteriology* 192 (4): 1113–21.
- 463 Koo, Jason, Ryan P Lamers, John L Rubinstein, Lori L Burrows, and P Lynne Howell. 2016. "Structure of the Pseudomonas Aeruginosa  
464 Type Iva Pilus Secretin at 7.4 Å." *Structure* 24 (10): 1778–87.

- 465 Kostylev, Maxim, Daniel Y Kim, Nicole E Smalley, Indraneel Salukhe, E Peter Greenberg, and Ajai A Dandekar. 2019. "Evolution of the  
466 *Pseudomonas Aeruginosa* Quorum-Sensing Hierarchy." *Proceedings of the National Academy of Sciences* 116 (14): 7027–32.
- 467 Köhler, Thilo, Simone F Epp, Lasta Kocjancic Curty, and Jean-Claude Pechère. 1999. "Characterization of Mext, the Regulator of the  
468 Mexe-Mexf-Oprn Multidrug Efflux System of *Pseudomonas Aeruginosa*." *Journal of Bacteriology* 181 (20): 6300–6305.
- 469 Köhler, Thilo, Christian Van Delden, Lasta Kocjancic Curty, Mehri Michea Hamzeshpour, and Jean-Claude Pechere. 2001.  
470 "Overexpression of the Mexef-Oprn Multidrug Efflux System Affects Cell-to-Cell Signaling in *Pseudomonas Aeruginosa*." *Journal of*  
471 *Bacteriology* 183 (18): 5213–22.
- 472 Kurtz, Stefan, Adam Phillippy, Arthur L Delcher, Michael Smoot, Martin Shumway, Corina Antonescu, and Steven L Salzberg. 2004.  
473 "Versatile and Open Software for Comparing Large Genomes." *Genome Biology* 5 (2): R12.
- 474 Lamont, Iain L, Paul A Beare, Urs Ochsner, Adriana I Vasil, and Michael L Vasil. 2002. "Siderophore-Mediated Signaling Regulates  
475 Virulence Factor Production in *Pseudomonas Aeruginosa*." *Proceedings of the National Academy of Sciences* 99 (10): 7072–7.
- 476 Latifi, A, M Foglino, K Tanaka, P Williams, and A Lazdunski. 1996. "A Hierarchical Quorum-Sensing Cascade in *Pseudomonas Aeruginosa*  
477 Links the Transcriptional Activators Lasr and Rhr (Vsmr) to Expression of the Stationary-Phase Sigma Factor Rpos." *Molecular*  
478 *Microbiology* 21 (6): 1137–46.
- 479 Lau, Gee W, Daniel J Hassett, Huimin Ran, and Fansheng Kong. 2004. "The Role of Pyocyanin in *Pseudomonas Aeruginosa* Infection."  
480 *Trends in Molecular Medicine* 10 (12): 599–606.
- 481 Lee, Jasmine, and Lianhui Zhang. 2015. "The Hierarchy Quorum Sensing Network in *Pseudomonas Aeruginosa*." *Protein & Cell* 6 (1):  
482 26–41.
- 483 Li, Heng. 2011. "A Statistical Framework for Snp Calling, Mutation Discovery, Association Mapping and Population Genetical Parameter  
484 Estimation from Sequencing Data." *Bioinformatics* 27 (21): 2987–93.
- 485 Li, Heng. 2018. "Minimap2: Pairwise Alignment for Nucleotide Sequences." *Bioinformatics* 34 (18): 3094–3100.
- 486 Li, Heng, and Richard Durbin. 2009. "Fast and Accurate Short Read Alignment with Burrows–Wheeler Transform." *Bioinformatics* 25  
487 (14): 1754–60.
- 488 Maseda, Hideaki, Kohjiro Saito, Akira Nakajima, and Taiji Nakae. 2000. "Variation of the mexT Gene, a Regulator of the Mexef-oprN  
489 Efflux Pump Expression in Wild-Type Strains of *Pseudomonas Aeruginosa*." *FEMS Microbiology Letters* 192 (1): 107–12.
- 490 Mattick, John S. 2002. "Type Iv Pili and Twitching Motility." *Annual Reviews in Microbiology* 56 (1): 289–314.
- 491 Mavrodi, Dmitri V, Robert F Bonsall, Shannon M Delaney, Marilyn J Soule, Greg Phillips, and Linda S Thomashow. 2001. "Functional  
492 Analysis of Genes for Biosynthesis of Pyocyanin and Phenazine-1-Carboxamide from *Pseudomonas Aeruginosa* Pao1." *Journal of*  
493 *Bacteriology* 183 (21): 6454–65.
- 494 Murrell, Ben, Steven Weaver, Martin D Smith, Joel O Wertheim, Sasha Murrell, Anthony Aylward, Kemal Eren, et al. 2015. "Gene-Wide  
495 Identification of Episodic Selection." *Molecular Biology and Evolution* 32 (5): 1365–71.

- 496 Murrell, Ben et al. "FUBAR: A Fast, Unconstrained Bayesian AppRoximation for inferring selection." *Mol. Biol. Evol.* 30, 1196–1205  
497 (2013).
- 498 Nguyen, Lam-Tung, Heiko A Schmidt, Arndt von Haeseler, and Bui Quang Minh. 2014. "IQ-Tree: A Fast and Effective Stochastic  
499 Algorithm for Estimating Maximum-Likelihood Phylogenies." *Molecular Biology and Evolution* 32 (1): 268–74.
- 500 Ochs, Martina M, Matthew P McCusker, Manjeet Bains, and Robert EW Hancock. 1999. "Negative Regulation of the Pseudomonas  
501 Aeruginosa Outer Membrane Porin Oprd Selective for Imipenem and Basic Amino Acids." *Antimicrobial Agents and Chemotherapy* 43  
502 (5): 1085–90.
- 503 Ohman, DE, SJ Cryz, and BH Iglewski. 1980. "Isolation and Characterization of Pseudomonas Aeruginosa Pao Mutant That Produces  
504 Altered Elastase." *Journal of Bacteriology* 142 (3): 836–42.
- 505 O'Toole, George A, and Roberto Kolter. 1998. "Flagellar and Twitching Motility Are Necessary for Pseudomonas Aeruginosa Biofilm  
506 Development." *Molecular Microbiology* 30 (2): 295–304.
- 507 Patel, Nishaben M, Joseph D Moore, Helen E Blackwell, and Daniel Amador-Noguez. 2016. "Identification of Unanticipated and Novel  
508 N-Acyl L-Homoserine Lactones (AHLs) Using a Sensitive Non-Targeted Lc-MS/MS Method." *PLoS One* 11 (10): e0163469.
- 509 Pearson, James P, Everett C Pesci, and Barbara H Iglewski. 1997. "Roles of Pseudomonas Aeruginosa Las and Rhl Quorum-Sensing  
510 Systems in Control of Elastase and Rhamnolipid Biosynthesis Genes." *Journal of Bacteriology* 179 (18): 5756–67.
- 511 Pesci, Everett C, James P Pearson, Patrick C Seed, and Barbara H Iglewski. 1997. "Regulation of Las and Rhl Quorum Sensing in  
512 Pseudomonas Aeruginosa." *Journal of Bacteriology* 179 (10): 3127–32.
- 513 Pletzer, Daniel, Corinne Lafon, Yvonne Braun, Thilo Köhler, Malcolm GP Page, Michael Mourez, and Helge Weingart. 2014. "High-  
514 Throughput Screening of Dipeptide Utilization Mediated by the Abc Transporter Dppbcdf and Its Substrate-Binding Proteins Dppa1-A5  
515 in Pseudomonas Aeruginosa." *PLoS One* 9 (10): e111311.
- 516 Poonsuk, Kanchana, Chanwit Tribuddharat, and Rungtip Chuanchuen. 2014. "Simultaneous Overexpression of Multidrug Efflux Pumps  
517 in Pseudomonas Aeruginosa Non-Cystic Fibrosis Clinical Isolates." *Canadian Journal of Microbiology* 60 (7): 437–43.
- 518 Poplin, Ryan, Valentin Ruano-Rubio, Mark A DePristo, Tim J Fennell, Mauricio O Carneiro, Geraldine A Van der Auwera, David E Kling, et  
519 al. 2018. "Scaling Accurate Genetic Variant Discovery to Tens of Thousands of Samples." *BioRxiv*, 201178.
- 520 Preston, Michael J, S M Fleiszig, Tanweer S Zaidi, Joanna B Goldberg, Virginia D Shortridge, Michael L Vasil, and Gerald B Pier. 1995.  
521 "Rapid and sensitive method for evaluating Pseudomonas aeruginosa virulence factors during corneal infections in mice." *Infection and*  
522 *Immunity* 63 (9): 3497–3501.
- 523 Pritchard, Leighton, Rachel H Glover, Sonia Humphris, John G Elphinstone, and Ian K Toth. 2016. "Genomics and Taxonomy in  
524 Diagnostics for Food Security: Soft-Rotting Enterobacterial Plant Pathogens." *Analytical Methods* 8 (1): 12–24.
- 525 Quale, John, Simona Bratu, Jyoti Gupta, and David Landman. 2006. "Interplay of Efflux System, ampC, and oprD Expression in  
526 Carbapenem Resistance of Pseudomonas Aeruginosa Clinical Isolates." *Antimicrobial Agents and Chemotherapy* 50 (5): 1633–41.
- 527 Rausch, Tobias, Thomas Zichner, Andreas Schlattl, Adrian M Stütz, Vladimir Benes, and Jan O Korb. 2012. "DELLY: Structural Variant  
528 Discovery by Integrated Paired-End and Split-Read Analysis." *Bioinformatics* 28 (18): i333–i339.



- 529 Ravel, Jacques, and Pierre Cornelis. 2003. "Genomics of Pyoverdine-Mediated Iron Uptake in Pseudomonads." *Trends in Microbiology*  
530 11 (5): 195–200.
- 531 Rice, Peter, Ian Longden, and Alan Bleasby. 2000. "EMBOSS: The European Molecular Biology Open Software Suite." Elsevier current  
532 trends.
- 533 Robinson, James T, Helga Thorvaldsdóttir, Wendy Winckler, Mitchell Guttman, Eric S Lander, Gad Getz, and Jill P Mesirov. 2011.  
534 "Integrative Genomics Viewer." *Nature Biotechnology* 29 (1): 24.
- 535 Rust, Lynn, Everett C Pesci, and Barbara H Iglewski. 1996. "Analysis of the Pseudomonas Aeruginosa Elastase (lasB) Regulatory Region."  
536 *Journal of Bacteriology* 178 (4): 1134–40.
- 537 Schuster, Martin, and E Peter Greenberg. 2006. "A Network of Networks: Quorum-Sensing Gene Regulation in Pseudomonas  
538 Aeruginosa." *International Journal of Medical Microbiology* 296 (2-3): 73–81.
- 539 Siewering, Katja, Samta Jain, Carmen Friedrich, Mariam T Webber-Birungi, Dmitry A Semchonok, Ina Binzen, Alexander Wagner, et al.  
540 2014. "Peptidoglycan-Binding Protein Tsap Functions in Surface Assembly of Type Iv Pili." *Proceedings of the National Academy of*  
541 *Sciences* 111 (10): E953–E961.
- 542 Singh, Pradeep K, Amy L Schaefer, Matthew R Parsek, Thomas O Moninger, Michael J Welsh, and EP Greenberg. 2000. "Quorum-  
543 Sensing Signals Indicate That Cystic Fibrosis Lungs Are Infected with Bacterial Biofilms." *Nature* 407 (6805): 762.
- 544 Sobel, Mara L, Shadi Neshat, and Keith Poole. 2005. "Mutations in Pa2491 (mexS) Promote Mext-Dependent mexEF-oprN Expression  
545 and Multidrug Resistance in a Clinical Strain of Pseudomonas Aeruginosa." *Journal of Bacteriology* 187 (4): 1246–53.
- 546 Stintzi, Alain, Kelly Evans, Jean-marie Meyer, and Keith Poole. 1998. "Quorum-Sensing and Siderophore Biosynthesis in Pseudomonas  
547 Aeruginosa: LasRllasI Mutants Exhibit Reduced Pyoverdine Biosynthesis." *FEMS Microbiology Letters* 166 (2): 341–45.
- 548 Stover, CK, XQ Pham, AL Erwin, SD Mizoguchi, P Warrener, MJ Hickey, FSL Brinkman, et al. 2000. "Complete Genome Sequence of  
549 Pseudomonas Aeruginosa Pao1, an Opportunistic Pathogen." *Nature* 406 (6799): 959.
- 550 Suyama, Mikita, David Torrents, and Peer Bork. 2006. "PAL2NAL: Robust Conversion of Protein Sequence Alignments into the  
551 Corresponding Codon Alignments." *Nucleic Acids Research* 34 (suppl\_2): W609–W612.
- 552 Taguchi, Fumiko, and Yuki Ichinose. 2011. "Role of Type Iv Pili in Virulence of Pseudomonas Syringae Pv. Tabaci 6605: Correlation of  
553 Motility, Multidrug Resistance, and Hr-Inducing Activity on a Nonhost Plant." *Molecular Plant-Microbe Interactions* 24 (9): 1001–11.
- 554 Tanizawa, Yasuhiro, Takatomo Fujisawa, and Yasukazu Nakamura. 2017. "DFAST: A Flexible Prokaryotic Genome Annotation Pipeline  
555 for Faster Genome Publication." *Bioinformatics* 34 (6): 1037–9.
- 556 Tian, Zhe-Xian, Emilie Fargier, Micheal Mac Aogain, Claire Adams, Yi-Ping Wang, and Fergal O’Gara. 2009. "Transcriptome Profiling  
557 Defines a Novel Regulon Modulated by the Lysr-Type Transcriptional Regulator Mext in Pseudomonas Aeruginosa." *Nucleic Acids*  
558 *Research* 37 (22): 7546–59.
- 559 Tian, Zhe-Xian, Micheal Mac Aogain, Hazel F O’Connor, Emilie Fargier, Marlies J Mooij, Claire Adams, Yi-Ping Wang, and Fergal O’Gara.  
560 2009. "Mext Modulates Virulence Determinants in Pseudomonas Aeruginosa Independent of the Mexef-Oprn Efflux Pump." *Microbial*  
561 *Pathogenesis* 47 (4): 237–41.

- 562 Valentini, Martina, and Alain Filloux. 2016. "Biofilms and Cyclic Di-Gmp (c-Di-Gmp) Signaling: Lessons from *Pseudomonas Aeruginosa*  
563 and Other Bacteria." *Journal of Biological Chemistry* 291 (24): 12547–55.
- 564 Van der Auwera, Geraldine A, Mauricio O Carneiro, Christopher Hartl, Ryan Poplin, Guillermo Del Angel, Ami Levy-Moonshine, Tadeusz  
565 Jordan, et al. 2013. "From Fastq Data to High-Confidence Variant Calls: The Genome Analysis Toolkit Best Practices Pipeline." *Current*  
566 *Protocols in Bioinformatics* 43 (1): 11–10.
- 567 Walsh, F, and SGB Amyes. 2007. "Carbapenem Resistance in Clinical Isolates of *Pseudomonas Aeruginosa*." *Journal of Chemotherapy*  
568 19 (4): 376–81.
- 569 Wick, Ryan R, Louise M Judd, Claire L Gorrie, and Kathryn E Holt. 2017. "Unicycler: Resolving Bacterial Genome Assemblies from Short  
570 and Long Sequencing Reads." *PLoS Computational Biology* 13 (6): e1005595.
- 571 Winsor, Geoffrey L, Emma J Griffiths, Raymond Lo, Bhavjinder K Dhillon, Julie A Shay, and Fiona SL Brinkman. 2015. "Enhanced  
572 Annotations and Features for Comparing Thousands of *Pseudomonas* Genomes in the *Pseudomonas* Genome Database." *Nucleic Acids*  
573 *Research* 44 (D1): D646–D653.
- 574 Winstanley, Craig, Siobhan O'Brien, and Michael A Brockhurst. 2016. "*Pseudomonas Aeruginosa* Evolutionary Adaptation and  
575 Diversification in Cystic Fibrosis Chronic Lung Infections." *Trends in Microbiology* 24 (5): 327–37.
- 576 Ye, Kai, Marcel H Schulz, Quan Long, Rolf Apweiler, and Zemin Ning. 2009. "Pindel: A Pattern Growth Approach to Detect Break Points  
577 of Large Deletions and Medium Sized Insertions from Paired-End Short Reads." *Bioinformatics* 25 (21): 2865–71.
- 578 Zhang, Jin, Jiayin Wang, and Yufeng Wu. 2012. "An Improved Approach for Accurate and Efficient Calling of Structural Variations with  
579 Low-Coverage Sequence Data." In *BMC Bioinformatics*, 13:S6. 6. BioMed Central.
- 580 **Table and Figure Legends:**
- 581 **Table 1.** Strain selection and genome characteristics. All PAO1 subline BioSample accession numbers are listed on the table.
- 582 **Table 2.** List of individual SNPs in each subline. ALT represent sublines genotype. PAO1-E is devoid of individual SNPs from whole  
583 genomic sequence.
- 584 **Table 3.** List of structure variation in each subline.
- 585 **Figure 1.** Quorum Sensing signals and virulence factors production in *P. aeruginosa* PAO1 sublines. The level of QS signals and virulence  
586 factors produced were compared to that of the PAO1-E with the mean set to 100%. Data represent the mean+/- SD of 3 independent  
587 experiments.
- 588 **Figure 2. A)** Biofilm formation was assayed from 16-hour LB cultures in 96 well plates. The data represent mean+/- SD of 6  
589 independent biofilm assays. **B)** Swimming motility of the sublines (n=3) **C)** Swarming (top) and twitching (bottom) motility was assayed  
590 on LB medium incubated for 16 hours(n=3).
- 591 **Figure 3. A)** Venn diagram showing the SNPs shared among the *P. aeruginosa* PAO1 sublines.

592 **Figure 4.** Quorum sensing signal and Virulence production in PAO1-E derivatives. **A-F)** Assay were performed with strains grown for 16  
593 hours in LB medium. The amount of signal and virulence produced by PAO1-E was arbitrarily set at 100%. **G)** Swarming motility(top)  
594 and crystal violet stained twitching motility (bottom) of the sublines.

595 **Figure 5.** Nucleotide substitution rates of single-copy genes in *P. aeruginosa*. *The colored arrows show the positions of the genes and*  
596 *their respective dN/dS ratios.*

597 **Figure 6.** The *mexT* and *lasR* sequence substitution rate in *P. aeruginosa*. **A.** The nonsynonymous (orange peaks) and synonymous  
598 (green peaks) substitution rate in the amino acid sequences of LasR (top) and MexT (down). **B.** The indel frequency of LasR nucleotides  
599 (up) and amino acid sequences (down) in *P. aeruginosa* strains. **C.** The indel frequency of MexT nucleotides (up) and amino acid  
600 sequences (down) in *P. aeruginosa* strains. The deletion and insertion are indicated with orange and green dots.

601

Table 1. *Pseudomonas aeruginosa* PAO1 sublines collection and genome characteristics

| Strain name | Source                                                 | NCBI BioSample accession no. | Genome size (bp) | GC content(%N50) |           |
|-------------|--------------------------------------------------------|------------------------------|------------------|------------------|-----------|
| PAO1-A      | Integrative Microbiology Research Centre, SCAU (China) | SAMN13612472                 | 6,288,998        | 66.48            | 6,275,114 |
| PAO1-B      | Integrative Microbiology Research Centre, SCAU (China) | SAMN13612473                 | 6,228,094        | 66.55            | 289,506   |
| PAO1-C      | Integrative Microbiology Research Centre, SCAU (China) | SAMN13612474                 | 6,266,737        | 66.53            | 6,266,737 |
| PAO1-D      | Integrative Microbiology Research Centre, SCAU (China) | SAMN13612475                 | 6,221,211        | 66.58            | 321,466   |
| PAO1-E      | University of Washington(U.S.A)                        | SAMN13612476                 | 6,275,136        | 66.54            | 6,275,136 |

Fig. 1. Quorum sensing signal and virulence production are significantly different among the sublines

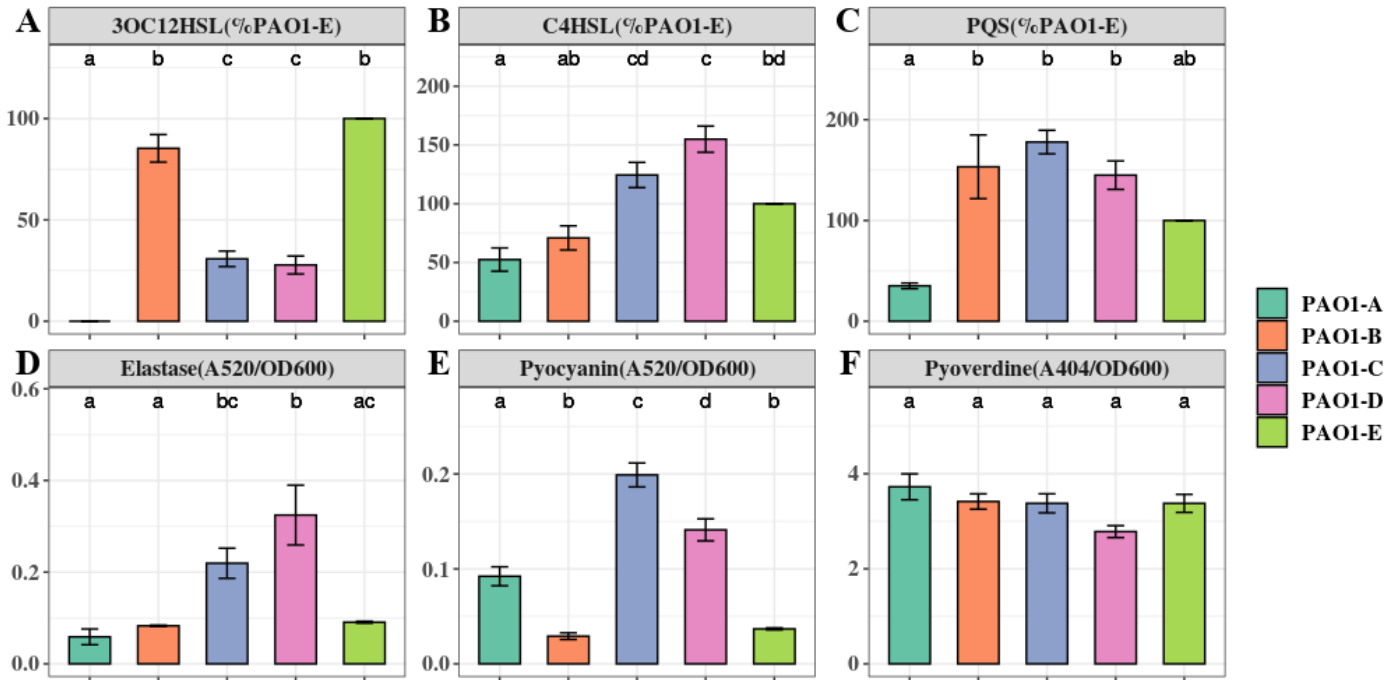

Fig. 2. Biofilm formation and motility of the PAO1 sublines

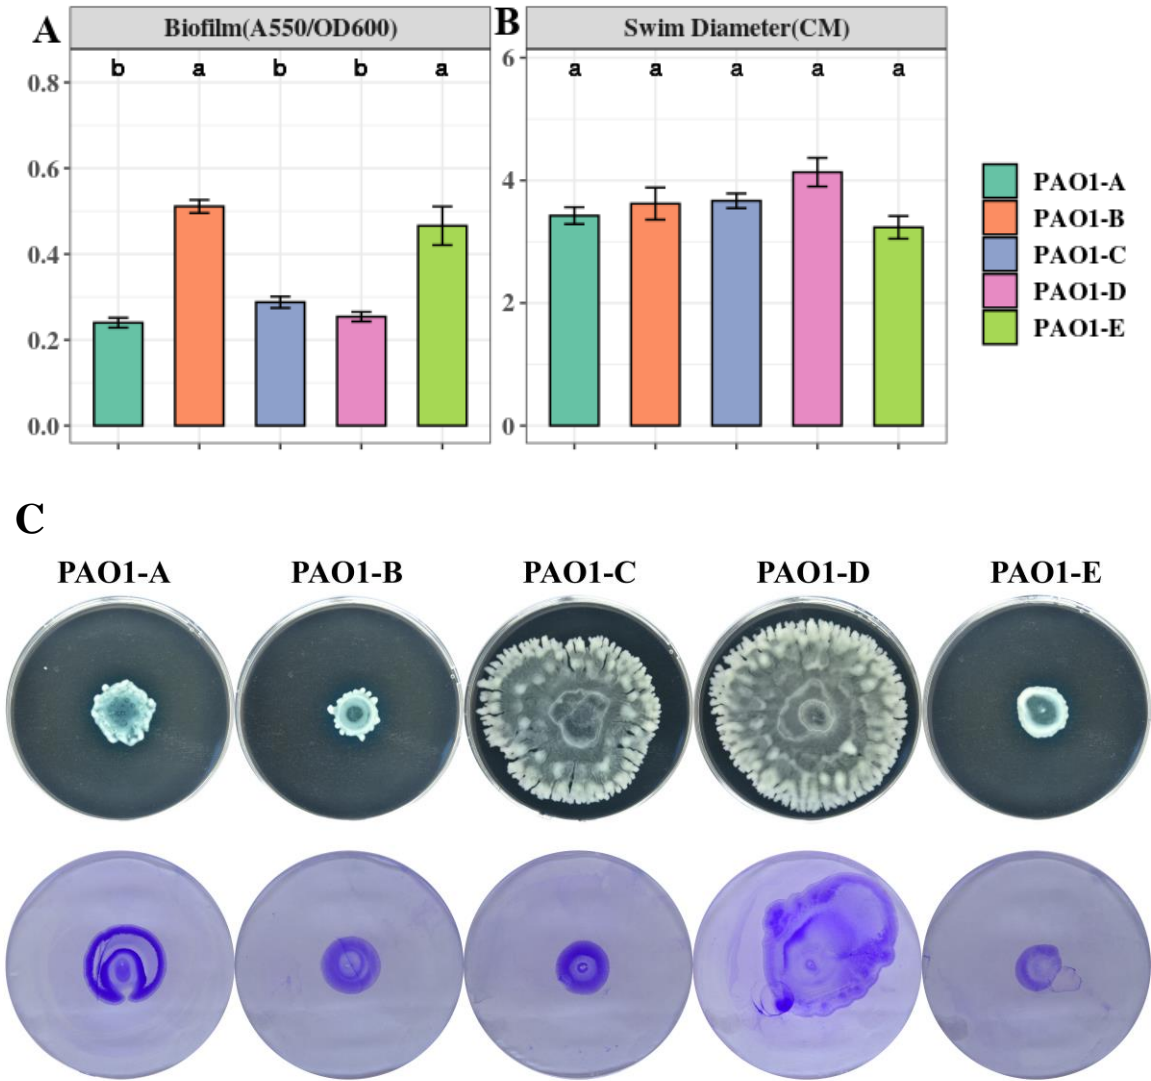

Table 2. SNPs of *P. aeruginosa* PAO1 sublines

| Category | Position | Locus                   | REF                 | ALT  | SNP Type                     | Encoded product                      |
|----------|----------|-------------------------|---------------------|------|------------------------------|--------------------------------------|
| PAO1-A   | 22278    | PA0020                  | C                   | T    | synonymous_variant           | T4P secretin-associated protein TsaP |
|          | 1558324  | PA1430                  | A                   | ATCG | disruptive_inframe_insertion | transcriptional regulator LasR       |
|          | 2160063  | PA1975                  | T                   | G    | missense_variant             | hypothetical protein                 |
|          | 2807724  | PA2492                  | GCGCTGTCGCGCCTGCGCA | G    | disruptive_inframe_deletion  | transcriptional regulator MexT       |
|          | 3582640  | PA3191                  | C                   | A    | missense_variant             | glucose transport sensor GtrS        |
|          | 5036907  | Interg. (PA4499-PA4500) | C                   | G    |                              | PdsR-DppA3                           |
| PAO1-B   | 4785702  | PA4277.2                | G                   | A    | missense_variant             | tRNA-Gly                             |
| PAO1-C   | 3823424  | PA3316                  | C                   | T    | synonymous_variant           | probable permease of ABC transporter |
|          | 4785702  | PA4277.2                | G                   | A    | missense_variant             | tRNA-Gly                             |
| PAO1-D   | 5036884  | Interg. (PA4499-PA4500) | C                   | T    |                              | PdsR-DppA3                           |
|          | 22278    | PA0020                  | C                   | T    | synonymous_variant           | T4P secretin-associated protein TsaP |
|          | 1737560  | PA1596                  | A                   | G    | missense_variant             | heat shock protein HtpG              |
|          | 2807724  | PA2492                  | GCGCTGTCGCGCCTGCGCA | G    | disruptive_inframe_deletion  | transcriptional regulator MexT       |
|          | 3500812  | PA3118                  | C                   | A    | synonymous_variant           | 3-isopropylmalate dehydrogenase      |
|          | 4118004  | PA3676                  | C                   | G    | missense_variant             | MexK                                 |
|          | 5036884  | Interg. (PA4499-PA4500) | C                   | A    |                              | PdsR-DppA3                           |

Fig. 3. SNPs of *P. aeruginosa* PAO1 sublines

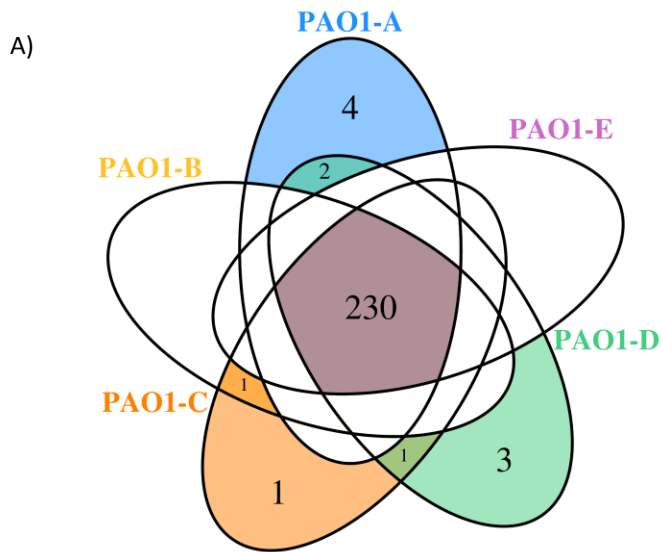



Table 3. SVs of *P. aeruginosa* PAO1 sublines

| Category            | Start Position | End Position | Len(bp) | Locus                                    | SVs type | Encoded product                                      |
|---------------------|----------------|--------------|---------|------------------------------------------|----------|------------------------------------------------------|
| SVs in all sublines | 5253693        | 5254687      | 994     | PA4684/PA4685                            | DEL      | hypothetical protein                                 |
|                     | 789150         | 795774       | 6624    | PA0717-PA0727                            | CNV      | hypothetical protein of bacteriophage Pfl            |
| SV in PAO1-C only   | 2808156        | 2816540      | 8384    | mexT/mexE/mexF/oprN/PA2496/PA2497/PA2498 | DEL      | Resistance-Nodulation-Cell Division multidrug efflux |

Fig. 4. Quorum sensing signal and Virulence production in PAO1-E derivatives

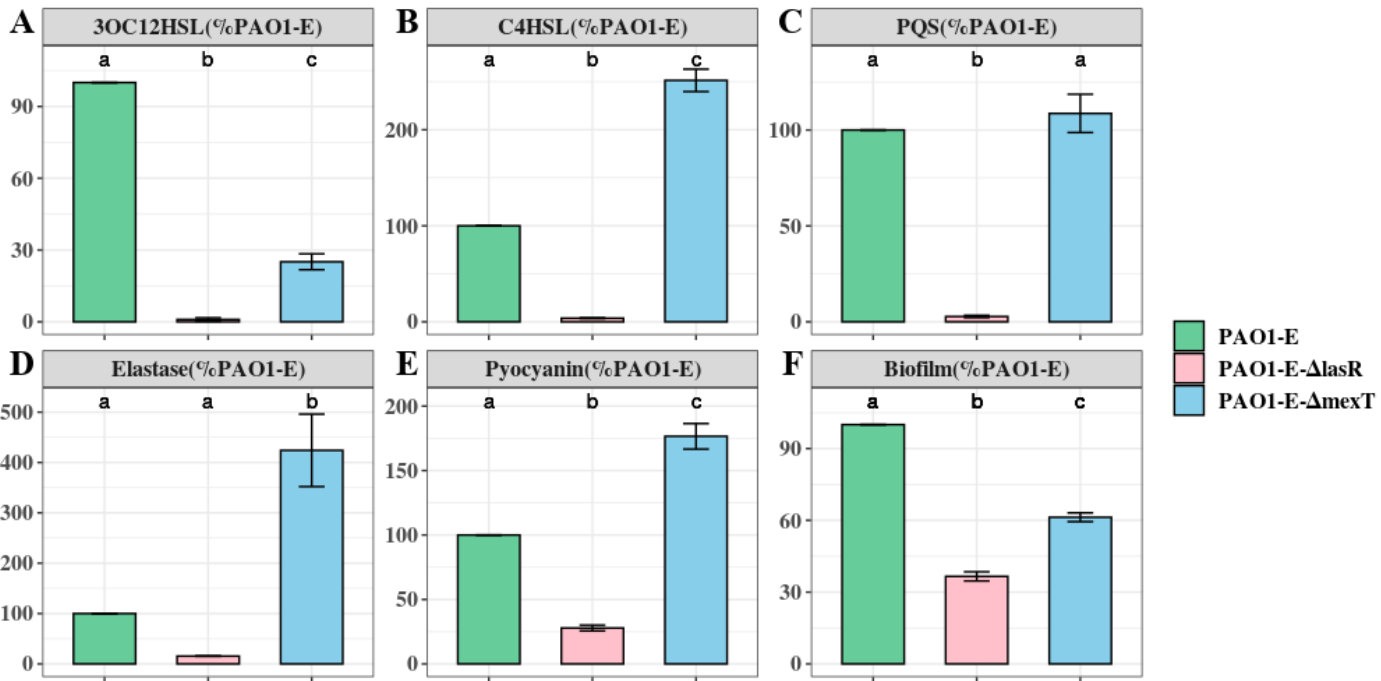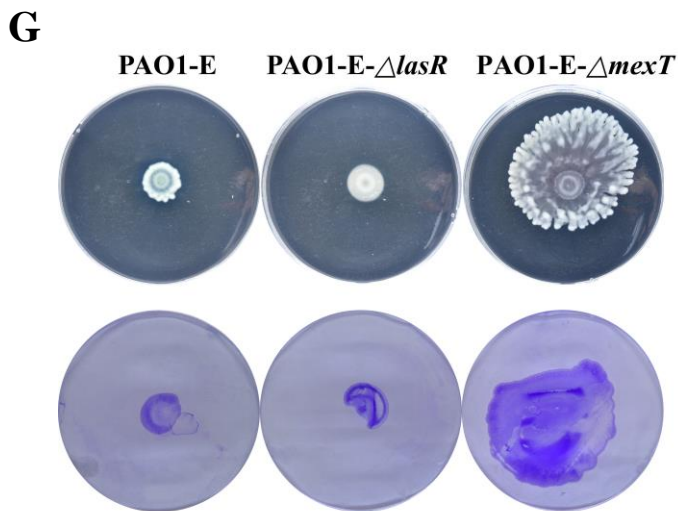

Fig. 5. Nucleotide substitution rates of single-copy genes in *P. aeruginosa*

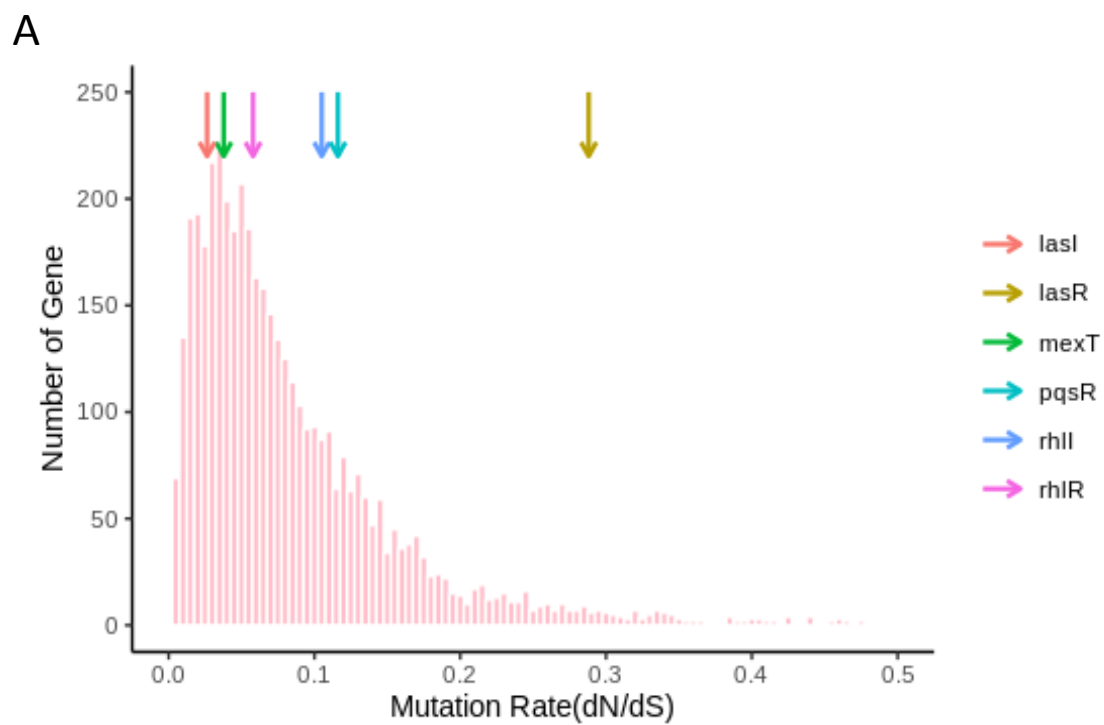

Fig. 6. The *mexT* and *lasR* sequence substitution rate in *P. aeruginosa*

A

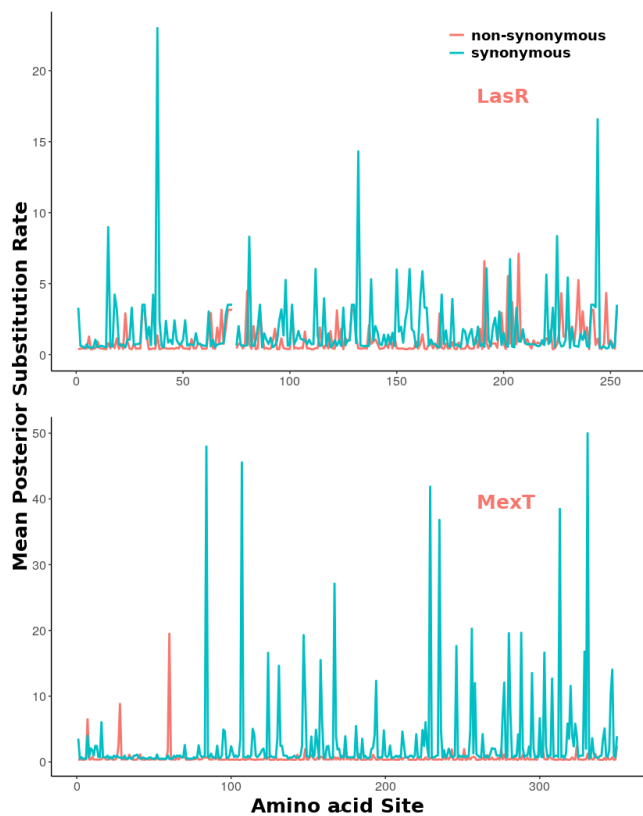

B

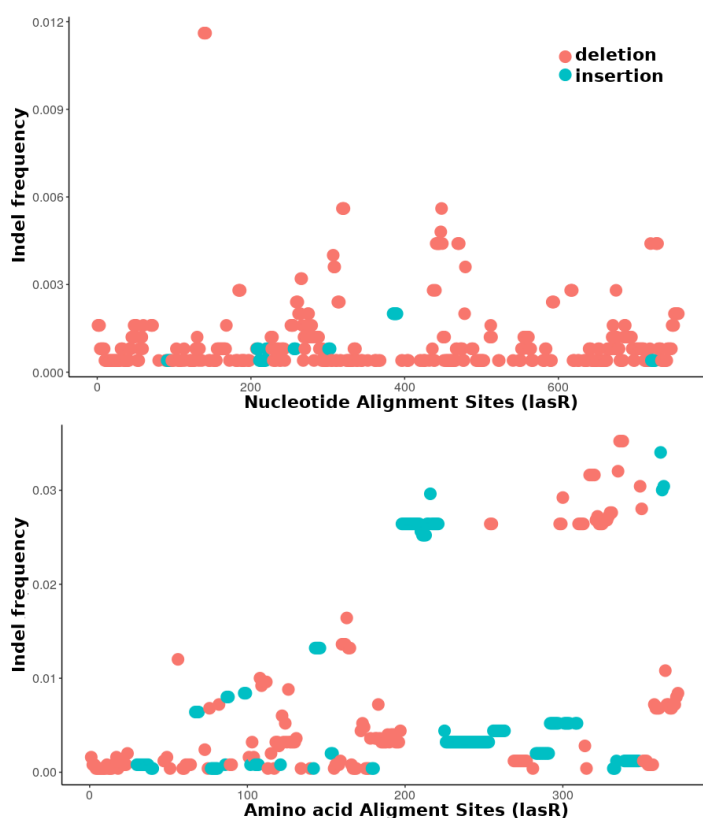

C

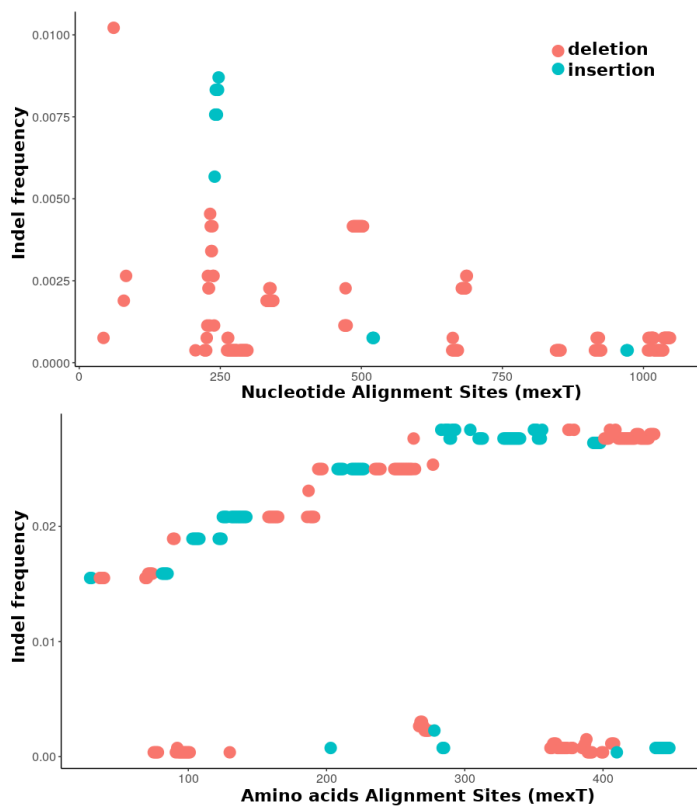

Source: https://www.biorxiv.org/content/10.1101/2020.10.13.338434v1.full.pdf
